# Supplementary material for: Fitting Early Phases of the COVID-19 Outbreak: A Comparison of the Performances of Used Models
Source: MDPI journal article supplement (doi:10.3390/healthcare11162363), 2023-08-21
Supplement: s1 [file s1]

## *Supplementary Material*

### **Fitting Early Phases of the COVID-19 Outbreak: A Comparison of the Performances of Used Models**

**Veronica Sciannameo<sup>1,2,+</sup>, Danila Azzolina<sup>3,1,+</sup>, Corrado Lanera<sup>1</sup>, Aslihan Şentürk Acar<sup>4</sup>, Maria Assunta Corciulo<sup>1</sup>, Rosanna Irene Comoretto<sup>5,1</sup>, Paola Berchialla<sup>2++</sup>, Dario Gregori<sup>1+++</sup>**

+ co-primary

++ co-last

<sup>1</sup>Unit of Biostatistics, Epidemiology and Public Health, Department of Cardiac, Thoracic, Vascular Sciences, and Public Health, University of Padova, Italy

<sup>2</sup>Center of Biostatistics, Epidemiology and Public Health, Department of Clinical and Biological Sciences, University of Torino, Italy

<sup>3</sup>Department of Environmental and Preventive Sciences, University of Ferrara, Ferrara, Italy.

<sup>4</sup>Department of Actuarial Sciences, Hacettepe University, Ankara, Turkey.

<sup>5</sup>Department of Public Health and Pediatrics, University of Turin, Turin, Italy

#### **\* Correspondence:**

Prof. Dario Gregori

Unit of Biostatistics, Epidemiology, and Public Health

Department of Cardiac, Thoracic, Vascular Sciences and Public Health

Via Loredan, 18

35131 Padova – Italy

Phone: +39 049 8275384

Email: [dario.gregori@unipd.it](mailto:dario.gregori@unipd.it)

#### **1 Models Considered**

## 1.1 Epidemic models

We identified statistical models widely applied for predictions during the first epidemic wave of COVID-19 around the world. The statistical approaches selected along with the corresponding reference(s) are summarized in Table 1 of the main manuscript; the description of the model parameters is reported in Table S1.

## 1.2 Compartmental Models

A compartmental model assumes that the overall population is divided into compartments. A SIR model, for example, allocates each person in the population to one of the following compartments: Susceptible, Infected, and Recovered; the SIRD model instead considers also the Deceased. According to the model, individuals can flow between different compartments. The flows and interaction rates between compartments are known as the model parameters (1). Prior assumptions on these parameters are necessary to model the epidemic growth trend (2).

The SIR model assumes that individuals in the population can be classified as susceptible, infected, or recovered. The transitions between these compartments are modeled using a system of ordinary differential equations (ODEs).

Let  $S(t)$ ,  $I(t)$ , and  $R(t)$  be the number of individuals in the population who are susceptible, infected, and recovered at time  $t$ , respectively. The basic reproductive number,  $R_0$ , represents the expected number of secondary cases produced by a typical primary case in a completely susceptible population. It is a key parameter in the model, as it determines whether an outbreak will grow or die out.

The equations for the SIR model are:

$$\begin{aligned} dS/dt &= -\beta SI/N \\ dI/dt &= \beta SI/N - \gamma I \\ dR/dt &= \gamma I \end{aligned}$$

where  $\beta$  is the transmission rate,  $\gamma$  is the recovery rate, and  $N$  is the total population size. The first equation represents the rate of change of the susceptible population, which is decreasing as individuals become infected. The second equation represents the rate of change of the infected population, which is increasing due to transmission from the susceptible population and decreasing due to recovery. The third equation represents the rate of change of the recovered population, which is increasing as individuals recover from the disease.

The SIRD model adds a compartment for deaths, represented by the variable  $D(t)$ . The equations for the SIRD model are:

$$\begin{aligned} dS/dt &= -\beta SI/N \\ dI/dt &= \beta SI/N - (\gamma + \mu)I \\ dR/dt &= \gamma I \\ dD/dt &= \mu I \end{aligned}$$

where  $\mu$  is the mortality rate, representing the proportion of infected individuals who die from the disease. The first three equations are the same as in the SIR model, while the fourth equation represents the rate of change of the deceased population, which is increasing as individuals die from the disease.

As the transmission rate, recovery rate, and death rate in Italy during the first wave of the pandemic were still highly debated, the parameters for these models were estimated directly from the data, using a nonlinear minimization procedure (3). In the model implementation, we allowed for the parameters to change over time, to account for variations in the epidemic dynamic (e.g. a different transmission rate before and after the implementation of physical distancing and control measures).

### 1.3 Data-Driven Models

Data-driven models are attractive, especially with the little information available on the evolution pattern of the pandemic, because they do not assume preliminary knowledge of the mechanism of transmission of the disease (32). In the following part, a short presentation of the main data-driven models is provided.

#### 1.3.1 Exponential model

The exponential model, which was introduced by Thomas Robert Malthus (4), assumes a geometric growth mechanism for the phenomenon considered. The model is defined by the following equation:

$$y_t = y_0 e^{rt}$$

where  $y_t$  is the growth function at a time  $t$ ,  $y_0$  is the value of  $y_t$  when  $t=0$  and  $r$  represents the relative increase or decrease of  $y$  for a unit increase of time  $t$ .

The nonlinear least squares were used for the estimation by considering the standard maximum likelihood (ML) algorithm (5).

#### 1.3.2 Quadratic regression model

The quadratic equation describes an increasing or decreasing trend that changes according to the level of time  $t$  (6). The most common parameterization is as follows:

$$y_t = y_0 + rt + pt^2$$

where the parameter  $y_0$  is the value of  $y_t$  when  $t=0$ ,  $r$  is the linear effect and represents the relative increase or decrease of  $y_0$  for a unit increase of time  $t$ , and  $p$  is the deceleration of the growth parameter that suggests how much the exponential growth is slowing.

- The stationary point is  $x_m = -\frac{r}{2p}$ .
- The parameters have been estimated using an ordinary least squares (OLS) estimation (7).

#### 1.3.3 Logistic regression, generalized logistic regression, and Richards regressions

The logistic regression curve models define an S-shaped growth with the Equation (8):

$$y_t = \frac{y_\infty}{1 + \left( \frac{y_\infty}{y_0} - 1 \right) e^{-rt}}$$

where  $y_\infty$  is the upper asymptote. The parameter  $r$  defines the logarithmic growth rate or steepness of the curve. Nonlinear least-square optimization was solved using the ML algorithm (5).

The generalized growth of logistic functions is an extension of logistic or sigmoid functions, allowing for more flexible S-shaped curves (9). The function is defined as (10) (11):

$$y_t = y_l + \frac{y_\infty - y_l}{(1 + \exp(k(\log(t) - r)))^g}$$

where  $y_l$  is the lower asymptote,  $y_\infty$  is the upper asymptote,  $r$  is the growth rate, and  $k$  is the slope around the inflection point. The function is asymmetric for  $g$  different from 1. Parameters are estimated using a general optimizer function to minimize the negative log-likelihood (12). The starting values to initialize the algorithm are defined considering a self-starting procedure as indicated in the literature (13).

Finally, the Richards model (RM) (9), also known as the power-law logistic model, is more flexible than the logistic one, since it has an additional parameter that controls the slowing rate of the exponential growth rate (14). The RM is described by the following equation (10,15):

$$y_t = y_l + \frac{y_\infty - y_l}{1 + \exp(k(\log(t) - \log(r)))}$$

In the aforementioned equation  $y_t$  is the growth function at the time  $t$ ,  $y_\infty$  is the upper asymptote,  $y_l$  is the lower asymptote,  $t$  is the time,  $k$  is the slope around the inflection point, and  $r$  is the growth rate. The nonlinear least-squares optimization was solved using the standard Levenberg-Marquardt (LM) algorithm (5).

### 1.3.4 Bertalanffy and Gompertz model

The Bertalanffy model is a growth model developed in the field of ecological research and is also used to describe the development of infectious diseases. The model is described by the following equation (10):

$$y_t = y_l + (y_\infty - y_l) \left( 1 - \exp\left(-\frac{t}{r}\right) \right)$$

In the equation  $y_t$  is the growth function at the time  $t$ ,  $y_\infty$  is the upper asymptote of the growth function,  $y_l$  is the lower asymptote of the growth function, and  $r$  is the growth rate (16).

Nonlinear least-square optimization was solved using the standard LM algorithm (5).

The Gompertz model for a time series is a sigmoid function that describes a growth pattern that is slowest at both the start and the end of a given period. The right-hand or future-value asymptote of the function is approached much more gradually by the curve than the left-hand or lower-value asymptote. This goes against the simple logistic function in which both asymptotes are approached by the curve symmetrically (10) (15). Parameters are estimated using an optimizer function to minimize negative log-likelihood (12). The starting values to initialize the algorithm are defined considering a self-starting procedure as indicated in the literature (13).

### 1.3.5 Generalized additive model (GAM)

GAM (17) is a generalized model in which the linear predictor depends linearly on unknown smooth functions defined on the time variable. The GAM function is defined as

$$y_t = y_0 + f_1(t)$$

The  $f_1$  is a function that may be defined considering a parametric, semiparametric, or not parametric smoothing. The scatterplot smoothing function with a natural spline was considered for computation. The optimization of the smoothness selection score has been carried out penalizing iteratively the reweighted least-squares scheme used to estimate the model given the smoothing parameters (18).

### 1.3.6 Poisson Generalized Linear Model (GLM).

A Poisson regression model may be defined considering the following parameterization.

$$\log(\lambda_t) = \log(N) + a + bt + ct^2 + dt^3$$

where  $N$  is the size of the population and  $\lambda_t$  is the parameter of the Poisson distribution of  $y_t$ . The estimation of model parameters is obtained using the ML approach performed using the Newton-Raphson (NR) algorithm (19).

### 1.3.7 ARIMA model

An Integrated Autoregressive Moving Average (ARIMA) model is a generalization of an Autoregressive Moving Average (ARMA) model, which is the basic model for analyzing stationary time series (20). In particular, the ARIMA models are used for non-stationary time series, where a differencing step can be applied to eliminate the non-stationarity.

Indicating with  $x$  the order of the autoregressive part, with  $y$  the degree of first differencing involved, and with  $z$  the order of the moving average part, let us model the epidemic series data  $y_t$  where  $t$  indicates the time, with an  $ARIMA(x, y, z)$  model given by:

$$y'_t = c + \phi_1 y'_{t-1} + \dots + \phi_x y'_{t-x} + \theta_1 \varepsilon_{t-1} + \dots + \theta_z \varepsilon_{t-z} + \varepsilon_t$$

Where  $\phi_i$  ( $i=1, \dots, x$ ) are the autoregressive coefficients, and  $\theta_i$  ( $i=1, \dots, z$ ) are the moving average coefficients. The different epidemic series is  $y'_t$ . The predictors on the right side include lagged  $y$  values and error  $\varepsilon$ . The order of the non-seasonal ARIMA model was selected using the Bayesian information criterion (21).

### 1.3.8 Empirical Bayesian Time Series Framework

In the model proposed by Liu et al., the natural logarithm of the total cases is modeled by a functional effects model as follows:

$$y_t = y_0 + f(t) + \varepsilon_t$$

Where  $y_0$  is the value of  $y_t$  when  $t=0$  and  $\varepsilon_t$  is the error component of the model. The functional effect  $f(t_j)$  is modeled as a cubic smoothing spline with the state space representation as:

$$\begin{pmatrix} f(t) \\ f'(t) \end{pmatrix} = H_f \begin{pmatrix} f(t-1) \\ f'(t-1) \end{pmatrix} + \omega_j$$

where  $f'(t_j)$  is the first derivative concerning time,  $H_f = \begin{pmatrix} 1 & \Delta t \\ 0 & 1 \end{pmatrix}$  is the state transition matrix, and

$\Delta t$  is the time interval between two points with the overall time range scaled to  $[0, 1]$ ,  $\omega_j \sim \text{Gaussian}\left(0, \sum_f\right)$  is the state innovation vector, with

and  $\alpha_f$  is a smoothing parameter.

Smoothing parameters and variances were estimated using the maximum penalized logarithmic likelihood approach (22):

$$\sum_f = \alpha_f^{-1} \begin{pmatrix} \frac{\Delta t^3}{3} & \frac{\Delta t^2}{2} \\ \frac{\Delta t^2}{2} & \Delta t \end{pmatrix}$$

All explanations of the model parameters are reported in Table 2.

## References

1. Brauer F, Van Den Driessche P, Wu J. Mathematical Epidemiology. In: Mathematical Epidemiology [Internet]. 2008. p. 19–79. Disponibile su: [https://doi.org/10.1007/978-3-540-78911-6\\_2](https://doi.org/10.1007/978-3-540-78911-6_2)
2. Lega J, Brown HE. Data-driven outbreak forecasting with a simple nonlinear growth model. *Epidemics*. dicembre 2016;17:19–26.
3. Cantó B, Coll C, Sánchez E. Estimation of parameters in a structured SIR model. *Adv Differ Equ*. 27 gennaio 2017;2017(1):33.
4. Malthus T, Gilbert G. An essay on the principle of population. Oxford university press. 2008. 172 p.
5. J.J. More. The Levenberg-Marquardt algorithm: implementation and theory,. *Lecture Notes in Mathematics* 630, Numerical Analysis. G.A. Watson (Ed.), Springer-Verlag. 1978;105–16.
6. Colman A. A dictionary of psychology. 3rd ed. Oxford University Press; 2009. 882 p.
7. Goldberger A. Econometric theory. New York Wiley; 1980. 399 p.
8. Vattay G. Predicting the ultimate outcome of the COVID-19 outbreak in Italy. 2020.
9. Richards F. J. A flexible growth function for empirical use. *Journal of Experimental Botany*. 1959;10(29):290–300.
10. Ritz C, Baty F, Streibig JC, Gerhard D. Dose-Response Analysis Using R. *PLOS ONE* [Internet]. 2015;10(e0146021). Disponibile su: <http://journals.plos.org/plosone/article?id=10.1371/journal.pone.0146021>
11. Finney DJ. Bioassay and the Practice of Statistical Inference. *Int Stat Rev Rev Int Stat*. 1979;47(1):1–12.
12. Ritz C, Streibig J. Bioassay Analysis Using R. *J Stat Softw Artic*. 2005;12(5):1–22.
13. Kniss AR, Vassios JD, Nissen SJ, Ritz C. Nonlinear Regression Analysis of Herbicide Absorption Studies. *Weed Sci*. 2017/01/20 ed. 2011;59(4):601–10.
14. Ma J. Estimating epidemic exponential growth rate and basic reproduction number. *Infect Dis Model*. 2020;5:129–41.
15. Seber GAF, Wild. Nonlinear Regression. New York: : Wiley \& Sons; 1989.
16. Jia L. Prediction and analysis of Coronavirus Disease 2019. 2019;(December).

17. Hastie T., Tibshirani R. Generalized additive models. Boca Raton, Fla: Chapman&Hall/CRC. 335 p.
18. Wood Simon N WSN. Thin plate regression splines. J R Stat Soc Ser B Stat Methodol. 28 gennaio 2003;65(1):95–114.
19. Cameron A, Trivedi P. Regression analysis of count data. Cambridge, UK ; New York, NY, USA: Cambridge University Press; 1998. 411 p.
20. Asteriou D, Hall S. Applied econometrics. 2nd ed. Basingstoke [England] ; New York: Palgrave Macmillan; 2011. 499 p.
21. Wit E, Heuvel E van den, Romeijn JW. ‘All models are wrong...’: an introduction to model uncertainty. Stat Neerlandica. 2012;66(3):217–36.
22. Liu Z, Guo W. Government Responses Matter: Predicting Covid-19 cases in US under an empirical Bayesian time series framework. medRxiv. 1 gennaio 2020;2020.03.28.20044578.

**Table S1.** Model parameters description.**GENERAL**

|       |                                                                   |
|-------|-------------------------------------------------------------------|
| $y_0$ | growth function at time $0$                                       |
| $y_t$ | growth function at time $t$                                       |
| $r$   | relative increase/decrease of $y$ for a unit increase at time $t$ |
| $t$   | time (days)                                                       |

**EXPONENTIAL**

|     |                                                                                        |
|-----|----------------------------------------------------------------------------------------|
| $p$ | deceleration of growth that suggests how much the exponential growth is getting slower |
|-----|----------------------------------------------------------------------------------------|

**LOGISTIC, GENERALIZED LOGISTIC, AND RICHARDS REGRESSION**

|     |                                   |
|-----|-----------------------------------|
| $k$ | slope around the inflection point |
| $g$ | Asymmetry parameter               |

**BERTANLAFFY AND GOMPERTZ MODEL**

|       |                                            |
|-------|--------------------------------------------|
| $y_l$ | the lower asymptote of the growth function |
| $k$   | slope around the inflection point          |

**GAM**

|          |                             |
|----------|-----------------------------|
| $f_1(t)$ | Smoothing function of time  |
| $y_0$    | growth function at time $0$ |

**POISSON GENERALIZED LINEAR MODEL**

|             |                                       |
|-------------|---------------------------------------|
| $\lambda_t$ | parameter of the Poisson distribution |
| $N$         | population size                       |



## ARIMA

|               |                                       |
|---------------|---------------------------------------|
| $x$           | order of the autoregressive part      |
| $y$           | degree of first differencing involved |
| $z$           | order of the moving average part      |
| $\phi_i$      | autoregressive coefficient            |
| $\theta_i$    | moving average coefficient            |
| $\varepsilon$ | error component                       |

## EMPIRICAL BAYESIAN TIME-SERIES FRAMEWORK

|            |                                  |
|------------|----------------------------------|
| $y_0$      | growth function at time $\theta$ |
| $f_{(tj)}$ | functional effect                |
| $e_{(ij)}$ | Error component                  |

**Table S2.** *MAE and MAPE for total cases.*

| Panel A MAE     |               |             |            |            |             |            |            |            |            |
|-----------------|---------------|-------------|------------|------------|-------------|------------|------------|------------|------------|
| MAE Total cases |               |             |            |            |             |            |            |            |            |
|                 | 20<br>days    | 30<br>days  | 40<br>days | 50<br>days | 60<br>days  | 70<br>days | 80<br>days | 90<br>days | 98<br>days |
| SIR             | 41763.128     | 61631.441   | 35256.829  | 10347.885  | 6568666.971 | 31502.821  | 6156.542   | 5848.646   | 5864.783   |
| SIRD            | 72337.880     | 58929.003   | 13365.466  | 11362.143  | 8943.640    | 9218.985   | 11300.318  | 14071.961  | 16238.300  |
| QUADRATIC       | 97997.40      | 193751.40   | 154878.92  | 87321.94   | 47068.22    | 26310.69   | 15939.50   | 11814.39   | 10717.30   |
| POISSON         | 10304600405   | 18490478.84 | 7220985.65 | 1001760.33 | 296970.06   | 126129.66  | 66763.88   | 44118.67   | 37380.12   |
| EXPONENTIAL     | 3135047236.35 | 47584391.83 | 2155106.81 | 415599.38  | 152029.57   | 74771.32   | 45701.66   | 35436.41   | 33583.14   |
| LOGISTIC        | 84445.80      | 50591.834   | 37550.557  | 24113.639  | 14249.145   | 8908.800   | 6675.314   | 5745.402   | 5490.985   |
| GOMPERTZ        | 26425.484     | 76467.629   | 10019.812  | 10273.975  | 5271.497    | 2478.100   | 1730.360   | 1472.068   | 1375.564   |
| GENLOGIS        | 68807.332     | 70585.583   | 300244.080 | 7279.645   | 1475.810    | 2471.948   | 1652.706   | 1220.359   | 1141.014   |
| BERTANLAFFY     | 89307.25      | 40508.43    | 17808.07   | 21585.43   | 23136.68    | 21610.55   | 18999.54   | 13133.76   | 12356.63   |
| RICHARDS        | 167294.370    | 57043.699   | 18413.441  | 10916.806  | 4130.433    | 1301.032   | 1303.410   | 1273.783   | 1251.391   |
| GAM             | 28797.356     | 62634.039   | 39824.904  | 18572.346  | 10623.839   | 6455.077   | 2994.290   | 2432.309   | 2835.908   |
| ARIMA           | 18794.23      | 46566.41    | 33809.95   | 13386.55   | 9144.54     | 2101.59    | 687.37     | 414.46     | 348.88     |

|  |          |          |          |          |          |           |          |         |         |         |
|--|----------|----------|----------|----------|----------|-----------|----------|---------|---------|---------|
|  | BAYESIAN | 23598.51 | 54401.91 | 34764.97 | 14652.44 | 25118.037 | 1637.306 | 890.288 | 390.443 | 279.796 |
|--|----------|----------|----------|----------|----------|-----------|----------|---------|---------|---------|

  

**Panel B MAPE**

|  |             | <i>MAPE Total cases</i> |         |         |         |         |         |         |         |         |
|--|-------------|-------------------------|---------|---------|---------|---------|---------|---------|---------|---------|
|  |             | 20 days                 | 30 days | 40 days | 50 days | 60 days | 70 days | 80 days | 90 days | 98 days |
|  | SIR         | 0.261                   | 0.349   | 0.269   | 0.216   | 27.863  | 0.303   | 0.210   | 0.214   | 0.215   |
|  | SIRD        | 0.406                   | 0.417   | 0.193   | 0.170   | 0.150   | 0.152   | 0.165   | 0.182   | 0.195   |
|  | QUADRATIC   | 0.555                   | 1.195   | 0.8488  | 1.312   | 2.114   | 2.997   | 3.893   | 4.645   | 5.091   |
|  | POISSON     | 44665.04                | 806.048 | 32.2841 | 5.517   | 3.170   | 3.335   | 4.120   | 5.143   | 6.037   |
|  | EXPONENTIAL | 13605.50                | 208.49  | 10.55   | 3.92    | 3.99    | 5.00    | 6.309   | 7.696   | 8.798   |
|  | LOGISTIC    | 0.477                   | 0.315   | 0.300   | 0.394   | 0.581   | 0.790   | 0.951   | 1.075   | 1.156   |
|  | GOMPertz    | 0.153                   | 0.401   | 0.130   | 0.128   | 0.081   | 0.051   | 0.044   | 0.044   | 0.046   |
|  | GENLOGIS    | 0.387                   | 0.411   | 0.208   | 0.157   | 0.074   | 0.112   | 0.150   | 0.101   | 0.070   |
|  | BERTANLAFFY | 0.895                   | 1.756   | 3.010   | 3.799   | 4.011   | 3.731   | 3.014   | 4.375   | 4.795   |
|  | RICHARDS    | 0.839                   | 0.347   | 0.210   | 0.116   | 0.089   | 0.176   | 0.206   | 0.197   | 0.183   |
|  | GAM         | 0.194                   | 0.303   | 0.218   | 0.187   | 0.287   | 0.181   | 0.1556  | 0.512   | 0.837   |
|  | ARIMA       | 0.128                   | 0.227   | 0.167   | 0.072   | 0.053   | 0.022   | 0.016   | 0.0015  | 0.015   |
|  | BAYESIAN    | 0.169                   | 0.265   | 0.169   | 0.077   | 3.515   | 0.017   | 0.0134  | 0.011   | 0.011   |

Table S3. *MAE and MAPE for new cases.*

Panel A MAE

MAE New cases

|             | 20 days   | 30 days  | 40 days  | 50 days  | 60 days  | 70 days  | 80 days  | 90 days  | 98 days  |
|-------------|-----------|----------|----------|----------|----------|----------|----------|----------|----------|
| SIR         | 1975.778  | 2140.135 | 2156.117 | 2536.731 | 2488.577 | 2258.779 | 2025.271 | 1996.667 | 2001.496 |
| SIRD        | 1627.866  | 1554.963 | 1202.559 | 923.431  | 646.679  | 469.803  | 480.777  | 528.935  | 531.310  |
| QUADRATIC   | 30910     | 19248    | 1360     | 3125     | 2610     | 1813     | 1247     | 942.8    | 890.5    |
| POISSON     | 138557124 | 1618152  | 45810    | 8243     | 3408     | 2086     | 1627     | 1481     | 1444     |
| EXPONENTIAL | 100371543 | 392235   | 18241    | 5178     | 2744     | 1937     | 1622     | 1508     | 1467     |
| LOGISTIC    | 17123     | 2830     | 2153     | 1839     | 1628     | 1466     | 1626     | 1044     | 1040     |
| GOMPERTZ    | 26256     | 3887     | 2221     | 1865     | 1647     | 1482     | 1626     | 1090     | 1090     |
| GENLOGIS    | 26709     | 2317     | 2100     | 1825     | 1614     | 1445     | 1339     | 1292     | 1288     |
| BERTANLAFFY | 5132      | 7630     | 3690     | 2194     | 1790     | 1595     | 1477     | 1418     | 1398     |
| RICHARDS    | 34816     | 3234     | 2173     | 1845     | 1631     | 1469     | 1364     | 1309     | 1553     |
| GAM         | 13561     | 5993     | 3767     | 380.8    | 1008     | 581.8    | 441.8    | 434.6    | 429.3    |
| ARIMA       | 5777      | 6249     | 1728     | 1046     | 865.7    | 471.8    | 380.8    | 357.9    | 350.2    |
| BAYESIAN    | 8156      | 8185     | 1643     | 696      | 342.2    | 483.1    | 284.3    | 273.5    | 273.9    |

Panel B MAPE

MAPE New cases

|           | 20 days    | 30 days  | 40 days | 50 days | 60 days | 70 days | 80 days | 90 days | 98 days |
|-----------|------------|----------|---------|---------|---------|---------|---------|---------|---------|
| SIR       | 0.8637     | 1.359    | 1.390   | 2.194   | 2.100   | 1.626   | 1.073   | 0.979   | 0.998   |
| SIRD      | 0.750      | 0.734    | 0.667   | 0.606   | 0.474   | 0.292   | 0.304   | 0.376   | 0.374   |
| QUADRATIC | 38.142     | 3.931    | 1.299   | 4.962   | 4.175   | 2.859   | 1.757   | 1.076   | 0.936   |
| POISSON   | 286791.803 | 3040.128 | 72.106  | 11.602  | 4.732   | 3.017   | 2.466   | 2.325   | 2.316   |

|                    |           |         |        |        |        |        |        |        |        |
|--------------------|-----------|---------|--------|--------|--------|--------|--------|--------|--------|
| <b>EXPONENTIAL</b> | 206712.44 | 692.865 | 26.593 | 7.207  | 3.936  | 2.890  | 2.465  | 2.295  | 2.229  |
| <b>LOGISTIC</b>    | 15.093    | 2.938   | 2.367  | 2.081  | 1.846  | 1.622  | 2.465  | 1.873  | 1.864  |
| <b>GOMPERTZ</b>    | 27.880    | 3.931   | 2.460  | 2.125  | 1.880  | 1.651  | 2.465  | 1.920  | 1.920  |
| <b>GENLOGIS</b>    | 26.508    | 2.551   | 2.315  | 2.051  | 1.804  | 1.574  | 1.368  | 1.218  | 1.161  |
| <b>BERTANLAFFY</b> | 6.035     | 8.895   | 4.198  | 2.620  | 2.188  | 1.912  | 1.671  | 1.480  | 1.357  |
| <b>RICHARDS</b>    | 38.8      | 3.349   | 2.445  | 2.146  | 1.907  | 1.682  | 1.459  | 1.285  | 2.017  |
| <b>GAM</b>         | 15.115    | 6.762   | 72.106 | 0.303  | 1.226  | 0.666  | 0.485  | 0.530  | 0.547  |
| <b>ARIMA</b>       | 6.719     | 7.204   | 1.977  | 1.245  | 1.007  | 0.449  | 0.2771 | 0.2257 | 0.2046 |
| <b>BAYESIAN</b>    | 9.372     | 9.247   | 2.05   | 0.7106 | 0.2401 | 0.5482 | 0.1737 | 0.1566 | 0.1552 |

**Table S4.** *Last observed vs last fitted total cases at i-th time.*

|                                                         | <b>20 days</b> | <b>30 days</b> | <b>40 days</b> | <b>50 days</b> | <b>60 days</b> | <b>70 days</b> | <b>80 days</b> | <b>90 days</b> | <b>98 days</b> |
|---------------------------------------------------------|----------------|----------------|----------------|----------------|----------------|----------------|----------------|----------------|----------------|
| <b>SIR</b><br>(last observed)                           | 21157          | 69176          | 119827         | 159516         | 189973         | 210717         | 222104         | 229327         | 233019         |
| <b>SIR</b><br>(last fitted)                             | 21584.20       | 69267.20       | 122272.33      | 165011.35      | 193105.45      | 215604.48      | 228034.57      | 96197.26       | 96197.26       |
| <b>SIRD</b><br>(last observed)                          | 21157          | 69176          | 119827         | 159516         | 189973         | 210717         | 222104         | 229327         | 233019         |
| <b>SIRD</b><br>(last fitted)                            | 21369.23       | 72418.37       | 125415.32      | 164263.35      | 189484.98      | 203030.27      | 207872.75      | 332688.76      | 332931.49      |
| <b>QUADRATIC</b><br>(last observed)                     | 21157          | 69176          | 119827         | 159516         | 189973         | 210717         | 222104         | 229327         | 233019         |
| <b>QUADRATIC</b><br>(last fitted)                       | 19815          | 68149          | 127566         | 173080         | 206592         | 229415         | 240955         | 245054         | 245047         |
| <b>POISSON</b><br>(last observed)                       | 21157          | 69176          | 119827         | 159516         | 189973         | 210717         | 222104         | 229327         | 233019         |
| <b>POISSON</b><br>(last fitted)                         | 22617          | 81924          | 158469         | 219954         | 267407         | 302390         | 324637         | 337802         | 343866         |
| <b>EXPONENTIAL</b><br>(last observed)                   | 21157          | 69176          | 119827         | 159516         | 189973         | 210717         | 222104         | 229327         | 233019         |
| <b>EXPONENTIAL</b><br>(last fitted)                     | 21564          | 74769          | 137025         | 186574         | 226150         | 256095         | 275523         | 287865         | 294305         |
| <b>LOGISTIC</b><br>(last observed)                      | 21157          | 69176          | 119827         | 159516         | 189973         | 210717         | 222104         | 229327         | 233019         |
| <b>LOGISTIC</b><br>(last fitted)                        | 20941          | 69451          | 117652         | 152926         | 181000         | 201699         | 214170         | 221761         | 225759         |
| <b>GOMPERTZ</b><br>(last observed)                      | 21157          | 69176          | 119827         | 159516         | 189973         | 210717         | 222104         | 229327         | 233019         |
| <b>GOMPERTZ</b><br>(last fitted)                        | 20642          | 70390          | 120887         | 157701         | 186705         | 207951         | 220528         | 227936         | 231654         |
| <b>GENLOGIS</b><br>(last observed)                      | 21157          | 69176          | 119827         | 159516         | 189973         | 210717         | 222104         | 229327         | 233019         |
| <b>GENLOGIS</b><br>(last fitted)                        | 20747          | 69318          | 118942         | 157742         | 188518         | 211040         | 223924         | 231261         | 234889         |
| <b>BERTANLAFFY</b><br>(last observed)                   | 21157          | 69176          | 119827         | 159516         | 189973         | 210717         | 222104         | 229327         | 233019         |
| <b>BERTANLAFFY</b><br>(last fitted)                     | 15356          | 51490          | 102349         | 149617         | 190181         | 223356         | 248069         | 185229         | 203047         |
| <b>RICHARDS</b><br><b>REGRESSION</b><br>(last observed) | 21157          | 69176          | 119827         | 159516         | 189973         | 210717         | 222104         | 229327         | 233019         |

## Supplementary Material

|                                                  |       |       |        |        |        |        |        |        |        |
|--------------------------------------------------|-------|-------|--------|--------|--------|--------|--------|--------|--------|
| <b>RICHARDS<br/>REGRESSION<br/>(last fitted)</b> | 20735 | 70303 | 119861 | 157064 | 186899 | 208945 | 222047 | 229880 | 233887 |
| <b>GAM<br/>(last observed)</b>                   | 21157 | 69176 | 119827 | 159516 | 189973 | 210717 | 222104 | 229327 | 233019 |
| <b>GAM<br/>(last fitted)</b>                     | 20700 | 69934 | 120738 | 158167 | 189576 | 212539 | 224554 | 231311 | 235013 |
| <b>ARIMA<br/>(last observed)</b>                 | 21157 | 69176 | 119827 | 159516 | 189973 | 210717 | 222104 | 229327 | 233019 |
| <b>ARIMA<br/>(last fitted)</b>                   | 20207 | 68716 | 119910 | 160455 | 190697 | 211228 | 222618 | 384116 | 426108 |
| <b>BAYESIAN<br/>(last observed)</b>              | 21157 | 69176 | 119827 | 159516 | 189973 | 210717 | 222104 | 229327 | 233019 |
| <b>BAYESIAN<br/>(last fitted)</b>                | 2829  | 5984  | 4426   | 3713   | 2745   | 1580   | 908.2  | 606.2  | 443.2  |

**Table S5.** Last observed vs last fitted new cases at the  $i$ -th time.

|                                                    | 20 days | 30 days | 40 days | 50 days | 60 days | 70 days | 80 days | 90 days | 98 days |
|----------------------------------------------------|---------|---------|---------|---------|---------|---------|---------|---------|---------|
| <b>SIR<br/>(last observed)</b>                     | 3497    | 5249    | 4585    | 3153    | 2646    | 1389    | 888     | 669     | 355     |
| <b>SIR<br/>(last fitted)</b>                       | 3351.21 | 5275.58 | 3759.55 | 3106.70 | 1354.60 | 1910.79 | 1271.68 | 0       | 0       |
| <b>SIRD<br/>(last observed)</b>                    | 3497    | 5249    | 4585    | 3153    | 2646    | 1389    | 888     | 669     | 355     |
| <b>SIRD<br/>(last fitted)</b>                      | 3333.95 | 5154.26 | 3576.14 | 2613.25 | 2116.96 | 1548.51 | 1074.90 | 0       | 0       |
| <b>QUADRATIC<br/>(last observed)</b>               | 3497    | 5249    | 4585    | 3153    | 2646    | 1389    | 888     | 669     | 355     |
| <b>QUADRATIC<br/>(last fitted)</b>                 | 3165    | 6359    | 5489    | 3716    | 2167    | 760.9   | 421.2   | 52795   | 62362   |
| <b>POISSON<br/>(last observed)</b>                 | 3497    | 5249    | 4585    | 3153    | 2646    | 1389    | 888     | 669     | 355     |
| <b>POISSON<br/>(last fitted)</b>                   | 3437    | 7666    | 7833    | 6564    | 5230    | 3954    | 2826    | 2023    | 1551    |
| <b>EXPONENTIAL<br/>(last observed)</b>             | 3497    | 5249    | 4585    | 3153    | 2646    | 1389    | 888     | 669     | 355     |
| <b>EXPONENTIAL<br/>(last fitted)</b>               | 3386    | 6731    | 6536    | 5585    | 4611    | 3659    | 2810    | 1625760 | 3379013 |
| <b>LOGISTIC<br/>(last observed)</b>                | 3497    | 5249    | 4585    | 3153    | 2646    | 1389    | 888     | 669     | 355     |
| <b>LOGISTIC<br/>(last fitted)</b>                  | 3355    | 5791    | 5284    | 4729    | 4259    | 3799    | 2824    | 6383    | 6383    |
| <b>GOMPERTZ<br/>(last observed)</b>                | 3497    | 5249    | 4585    | 3153    | 2646    | 1389    | 888     | 669     | 355     |
| <b>GOMPERTZ (last<br/>fitted)</b>                  | 3247    | 5925    | 5328    | 4724    | 4248    | 3789    | 2825    | 8179    | 8182    |
| <b>GENLOGIS<br/>(last observed)</b>                | 3497    | 5249    | 4585    | 3153    | 2646    | 1389    | 888     | 669     | 355     |
| <b>GENLOGIS<br/>(last fitted)</b>                  | 3282    | 5588    | 5242    | 4750    | 4278    | 3804    | 3351    | 5588    | 5588    |
| <b>BERTANLAFFY<br/>(last observed)</b>             | 3497    | 5249    | 4585    | 3153    | 2646    | 1389    | 888     | 669     | 355     |
| <b>BERTANLAFFY<br/>(last fitted)</b>               | 2512    | 5519    | 5806    | 4924    | 4256    | 3719    | 3254    | 18807   | 20578   |
| <b>RICHARDS<br/>REGRESSION (last<br/>observed)</b> | 3497    | 5249    | 4585    | 3153    | 2646    | 1389    | 888     | 669     | 355     |
| <b>RICHARDS<br/>REGRESSION (last<br/>fitted)</b>   | 3277    | 5817    | 5282    | 4719    | 4252    | 3796    | 3347    | 7092    | 7096    |
| <b>GAM<br/>(last observed)</b>                     | 3497    | 5249    | 4585    | 3153    | 2646    | 1389    | 888     | 669     | 355     |
| <b>GAM<br/>(last fitted)</b>                       | 3290    | 5730    | 4054    | 3637    | 3066    | 1990    | 1022    | 626.8   | 458.7   |
| <b>ARIMA<br/>(last observed)</b>                   | 3497    | 5249    | 4585    | 3153    | 2646    | 1389    | 888     | 669     | 416     |
| <b>ARIMA<br/>(last fitted)</b>                     | 2731    | 4962    | 4668    | 4092    | 3370    | 1900    | 1402    | 652     | 516     |
| <b>BAYESIAN<br/>(last observed)</b>                | 3497    | 5249    | 4585    | 3153    | 2646    | 1389    | 888     | 669     | 355     |
| <b>BAYESIAN<br/>(last fitted)</b>                  | 2829    | 5984    | 4426    | 3713    | 2745    | 1580    | 908.2   | 606.2   | 443.2   |
